# Supplementary material for: Silver single atom in polymeric carbon nitride as a stable and selective oxygen reduction electrocatalyst towards hydrogen peroxide synthesis
Source: Royal Society of Chemistry journal article supplement (doi:10.1039/d5ta05965h), 2026-01-01
Supplement: d5ta05965h1.pdf [file d5ta05965h1.pdf]

## ***Supporting Information***

### **Silver Single Atom in Polymeric Carbon Nitride as a Stable and Selective Oxygen Reduction Electrocatalyst towards Hydrogen Peroxide Synthesis**

*Akanksha Gupta<sup>1, #</sup>, Manoj Shanmugasundaram<sup>1, 2, #</sup>, Shilendra Kumar Sharma<sup>3</sup>, Sudip  
Chakraborty<sup>3</sup>, David Zitoun<sup>1, 2</sup>*

<sup>1</sup> Department of Chemistry, Bar-Ilan University, Ramat-Gan 5290002, Israel

<sup>2</sup> Bar-Ilan Nanotechnology and Advanced Materials Institute, Bar-Ilan University, Ramat-Gan  
5290002, Israel

<sup>3</sup>Materials Theory for Energy Scavenging (MATES) Lab, Department of Physics, Harish-  
Chandra Research Institute (HRI) Allahabad, A C.I. of Homi Bhabha National Institute (HBNI),  
Chhatnag Road, Jhansi, Prayagraj (Allahabad) 211019, India

## **Experimental Section**

### **Material and Methods**

#### **Chemicals and reagents**

Melamine (MA, 99%), cyanuric acid (CA, 99%), citric acid (CTA, 99.5%), and silver nitrate (AgNO<sub>3</sub>, 99.0%) were procured from Sigma-Aldrich. Nafion (perfluorinated resin solution, 5%, Aldrich), potassium hydroxide (pellets for analysis, EMSURE), potassium bicarbonate (CHEM-IMPEX), 2-propanol (HPLC grade, AR-b, Bio-Lab Ltd.), and absolute ethanol (dehydrated, AR-b, Bio-Lab Ltd.) were used in the study. All chemicals and reagents were used directly as received without any additional purification.

<sup>#</sup> Equal contribution

## **Synthesis of Ag-PCN**

For the synthesis of Ag-PCN, melamine (MA, 10 mmol) and cyanuric acid (CA, 9.5 mmol) were dissolved separately in ultrapure water under heating at 80°C to obtain homogeneous solutions, designated as solutions A and B, respectively. Citric acid (CTA, 0.5 mmol) and silver nitrate ( $\text{AgNO}_3$ , 0.25 mmol) were dissolved in ultrapure water to prepare solution C. Subsequently, solution C was added dropwise to solution B under continuous stirring for 10 minutes. The resulting mixture of solutions B and C was then introduced into solution A, and the combined solution was stirred for 4 hours at room temperature. The resulting supramolecular complex was isolated by centrifugation, washed three times with deionized water, followed by a single wash with ethanol, and dried overnight at 80°C. The dried supramolecule was then pyrolysis at 550°C under a nitrogen atmosphere for 4h, with a controlled heating rate of  $10^\circ\text{C}\cdot\text{min}^{-1}$ . The final product, a yellow powder denoted as Ag-PCN. A series of Ag-PCN materials with varying silver loadings were also synthesized by adjusting the initial concentration of  $\text{AgNO}_3$  during the preparation.

## **Synthesis of PCN**

The PCN was synthesized following the same procedure as Ag-PCN, with the exception that  $\text{AgNO}_3$  was not added during the preparation.

## **Material Characterization**

The morphology of Ag-PCN and PCN were obtained from High resolution scanning electron microscopy (HRSEM), Transmission electron microscopy (TEM), images were recorded by JEM2100 JEOL instrument. To analyze and confirm the formation of atomically dispersed Ag atom sites in PCN framework, High angle annular dark field-scanning transmission electron microscope (HAADF-STEM) FEI TITAN transmission electron microscope (TEM) operated at

300 kV. The amount of metal deposited in PCN framework was analyzed via ICP-AES (Ultima-2 spectrometer; Jobin Yvon Horiba). The X-ray diffraction pattern of Ag-PCN and were recorded with a Brucker D8 Advanced X-Ray diffractometer, using Cu K $\alpha$  radiation. The X-ray photoelectron spectroscopy (XPS) measurements were performed by Nexsa X-ray photoelectron spectrometer system (Thermo scientific) with a monochromates Al K $\alpha$  X-ray source.

### **Electrocatalytic Measurement**

All electrochemical measurements were conducted in a standard three-electrode cell equipped with a rotating ring-disk electrode (RRDE, Pine Instruments) and a Biologic electrochemical workstation. The RRDE served as the working electrode, comprising a glassy carbon disk (geometric area: 0.2475 cm<sup>2</sup>) and a platinum ring (geometric area: 0.1815 cm<sup>2</sup>). A graphite rod and a Hg/HgO electrode were used as the counter electrode and reference electrode, respectively. For the working electrode preparation, the catalyst ink was prepared by dispersing 2 mg of catalyst in a solution containing 950  $\mu$ L of isopropanol and 50  $\mu$ L of Nafion solution. The mixture was sonicated for 1 hour to achieve a homogeneous dispersion. Subsequently, 10  $\mu$ L of the catalyst ink was deposited onto a cleaned 5 mm glassy carbon disk of the RRDE. The electrode was rotated at 300 rpm for 15 minutes to ensure uniform distribution and then dried naturally at room temperature. All the catalysts loadings were maintained to be  $\sim 80 \mu\text{g cm}^{-2}$ . Oxygen reduction reaction (ORR) measurements were carried out in two different electrolytes: 0.1 M KOH and 0.1 M KHCO<sub>3</sub>. Linear sweep voltammetry (LSV) was performed at on rates of 625 rpm, 900 rpm, 1225 rpm, 1600 rpm, 2025 rpm and 2500 rpm in an O<sub>2</sub> saturated electrolyte. The potential applied for obtaining the ring current of the RRDE during H<sub>2</sub>O<sub>2</sub> production is 1.38V versus RHE. The H<sub>2</sub>O<sub>2</sub> selectivity and the electron transfer number (n) on the RRDE of the electrocatalysts were calculated based on the equation below.

$$H_2O_2\% = \frac{2I_R/N}{I_D + (I_R/N)} \times 100\%$$

$$n = 4 \times \frac{I_D}{I_D + (I_R/N)}$$

Where  $I_D$  and  $I_R$  are the background-corrected disk and ring currents, and  $N$  is the collection efficiency (0.37) of the platinum ring determined by measuring the redox of hexacyanoferrate ( $Fe(CN)_6^{3-}/[Fe(CN)_6]^{4-}$ ).

### **H<sub>2</sub>O<sub>2</sub> concentration measurement**

The potassium iodide titration method is used to determine the amount of H<sub>2</sub>O<sub>2</sub>. By mixing the known amount of commercial H<sub>2</sub>O<sub>2</sub> with a mixed solution containing 0.1M potassium hydrogen phthalate and 0.1M potassium Iodide and then measuring the absorbance of the mixed solution at a wavelength of 350 nm using an ultraviolet-visible spectrophotometer, a standard curve between the H<sub>2</sub>O<sub>2</sub> concentration and absorbance.

### **H<sub>2</sub>O<sub>2</sub> production in typical H-cell**

The production of H<sub>2</sub>O<sub>2</sub> is carried out in a two typical-chamber, three-electrode H-type electrolytic cell separated by a proton exchange membrane. Each compartment filled with 45 mL of 0.1M KHCO<sub>3</sub> solution with continuous O<sub>2</sub> purging. An Ag/AgCl electrode and glassy carbon rod used as the reference electrode and counter electrode. The working electrode is drop-casted with different catalyst inks onto a 1.0 x 1.0 cm<sup>2</sup> commercial carbon paper, with the catalysts loading of ~ 0.250mg cm<sup>-2</sup>. The chronoamperometry tests were carried out at fixed potential 0.42V vs RHE. Then, the amount of H<sub>2</sub>O<sub>2</sub> produced determined by the Potassium Iodide titration method.

## Computational Methodology

Density functional theory (DFT) based electronic structure calculations were performed to study the reaction mechanism of two-electron transfer  $\text{H}_2\text{O}_2$  production on Ag single atom catalyst on polycrystalline  $\text{C}_3\text{N}_4$  monolayer [1-2]. We considered 221 supercell of pristine  $\text{C}_3\text{N}_4$  monolayer to explore all possible binding sites in heptazine ring to accommodate the single Ag atom with 18 Angstrom vacuum in z-direction to avoid collapse of parallel periodic images. We utilized Perdew Burke Ernzerhof (PBE) exchange correlation functional in conjunction with projected augmented wave (PAW) formalism in all calculations [3-4]. Spin-polarized calculations were performed by exploiting Vienna *ab-initio* simulation package (VASP) [5-6]. Plane wave basis set energy cut off 500 eV and a Gamma centered  $4 \times 4 \times 1$  kpoints Brillouin zone sampling were utilized for geometry optimization and further adsorption free energy calculations [7]. Grimme dispersion-corrected DFT-D3 methodology was exploited throughout the calculations to account the Van der Waals dispersion forces between adsorbate and  $\text{C}_3\text{N}_4$  monolayer [8]. Energy convergence and force convergence criteria were kept  $10^{-5}$  eV and  $-0.01$  eV/Å respectively. Structures visualizations and images generation were performed by VESTA software [9]. Formation energy of Ag adsorbed/supported system and adsorbate \*OOH adsorption energy were calculated according to equation (1) and (2) respectively <sup>1-4</sup>:

Formation energy was calculated by utilizing the following given formula:

$$E_f = E_{\text{total}} - E_{\text{C}_3\text{N}_4} - E_{\text{ag}} \dots\dots\dots (1)$$

Where  $E_f$  = the formation energy of Ag adsorbed/support  $\text{C}_3\text{N}_4$  (221 supercell )

$E_{\text{total}}$  = the total energy after Ag adsorbed/support in  $\text{C}_3\text{N}_4$  (221 supercell)

$E_{\text{C}_3\text{N}_4}$  = the total energy of  $\text{C}_3\text{N}_4$  (221 supercell)

$E_{Ag}$  = energy of isolated single Ag atom

Adsorption energy of \*OOH was calculated by utilizing the given formula:

$$E_{ads} = E_{total} - E_{surface} - E_{adsorbate} \dots\dots\dots (2)$$

$E_{ads}$  = Adsorption Energy of the adsorbate molecule (\*OOH)

$E_{total}$  = Total energy of the molecule adsorbed on the  $C_3N_4$  monolayer

$E_{surface}$  = Energy of the pristine  $C_3N_4$  monolayer

$E_{adsorbate}$  = Adsorbate (OOH) molecule energy

Adsorption free energy at standard  $O_2$  reduction potential i.e. 0.7 V~ RHE has been calculated by considering computational hydrogen electrode (CHE) model with following relation :

$$\Delta G^{*OOH} = E_{ads} + \Delta ZPE - T\Delta S - eU \dots\dots\dots (1)$$

Where  $\Delta G^{*OOH}$ ,  $E_{ads}$ ,  $\Delta ZPE$ ,  $T\Delta S$ , and  $U$  are the change in adsorption free energy (eV) of \*OOH, adsorption energy of the OOH\* ( $E_{ads}$ ), zero point energy correction, entropic contribution ( $T=298.15$  K), and applied potential respectively.



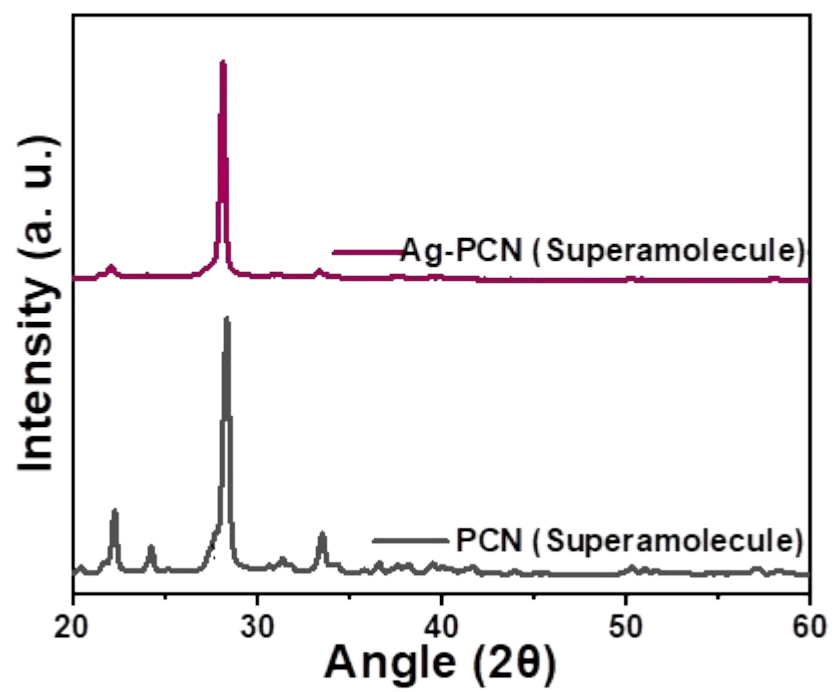

**Figure S1.** XRD spectra of Supramolecular.



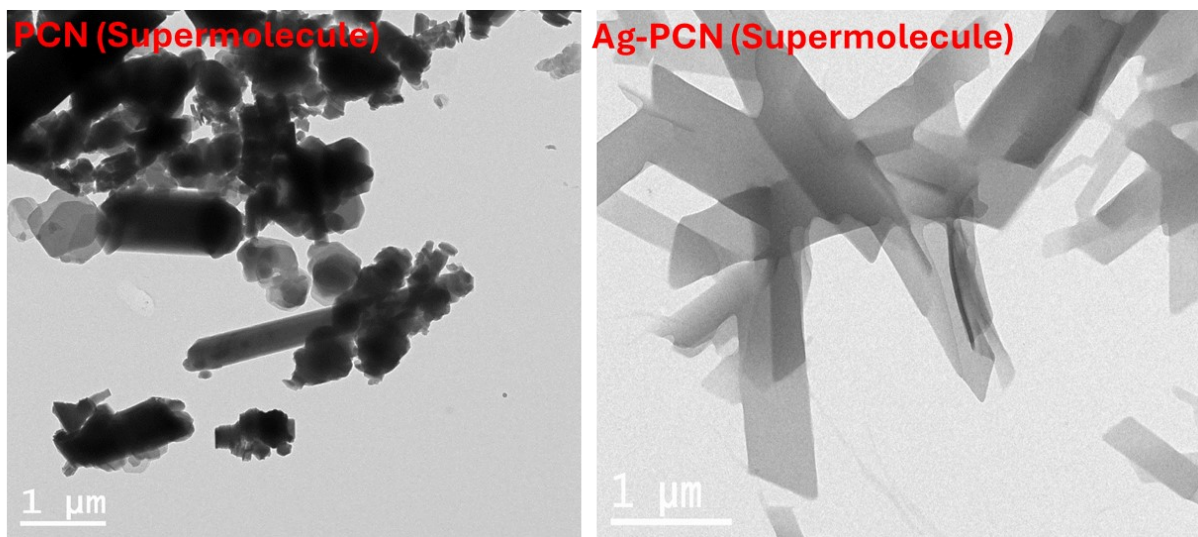

**Figure S2.** TEM images of PCN precursor supermolecules.



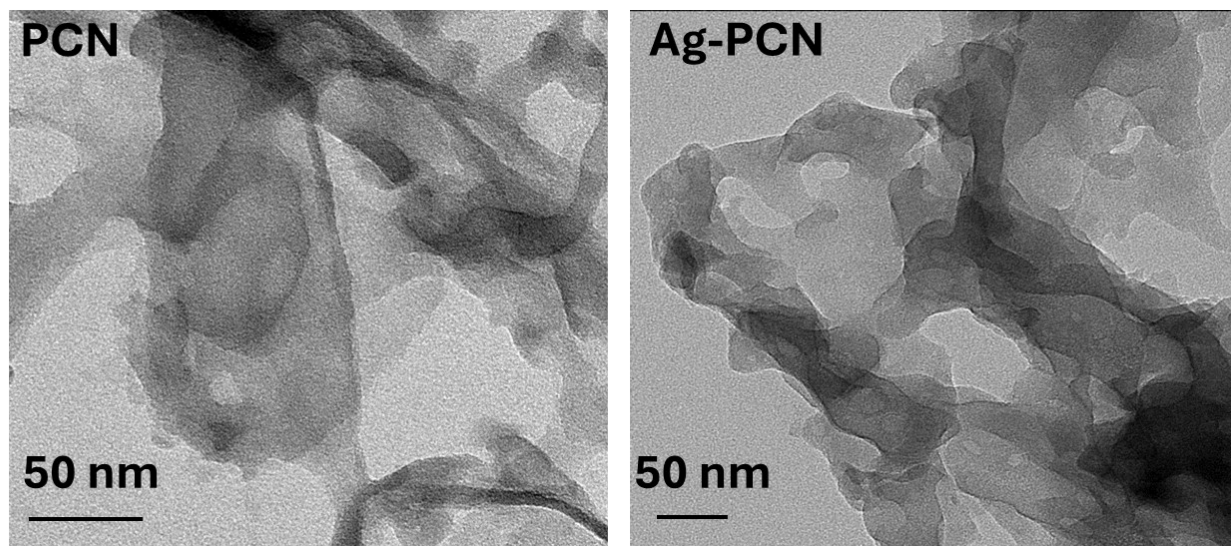

**Figure S4.** TEM images of PCN and Ag-PCN.

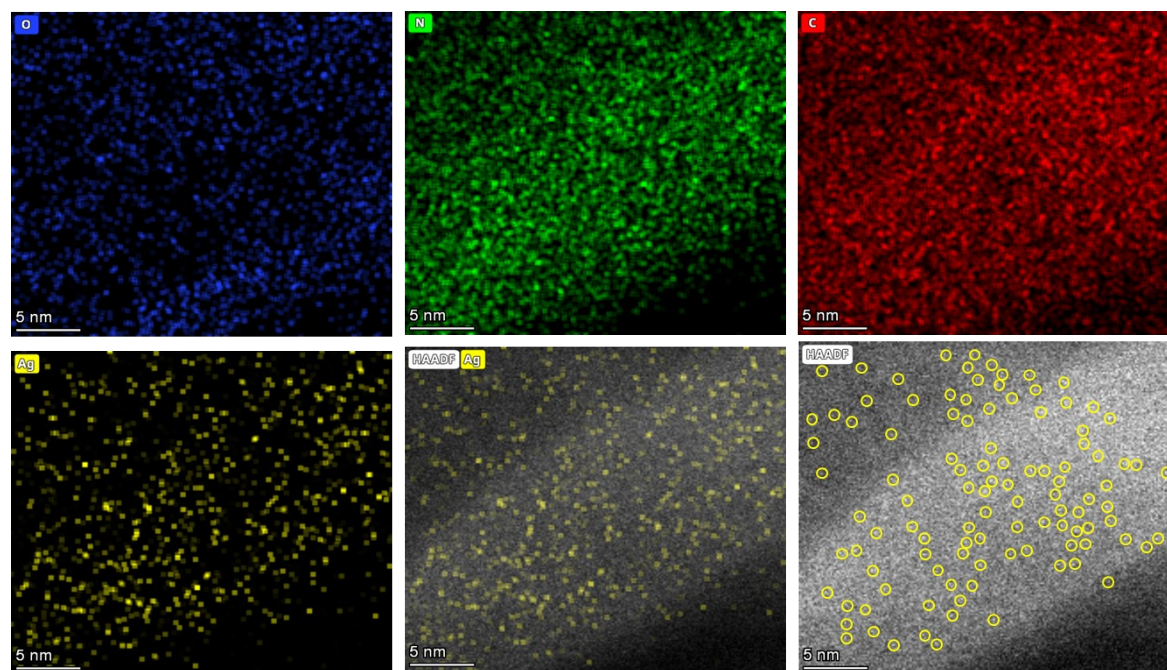

**Figure S5.** EDS Mapping and HAAD-STEM image of Ag-PCN.



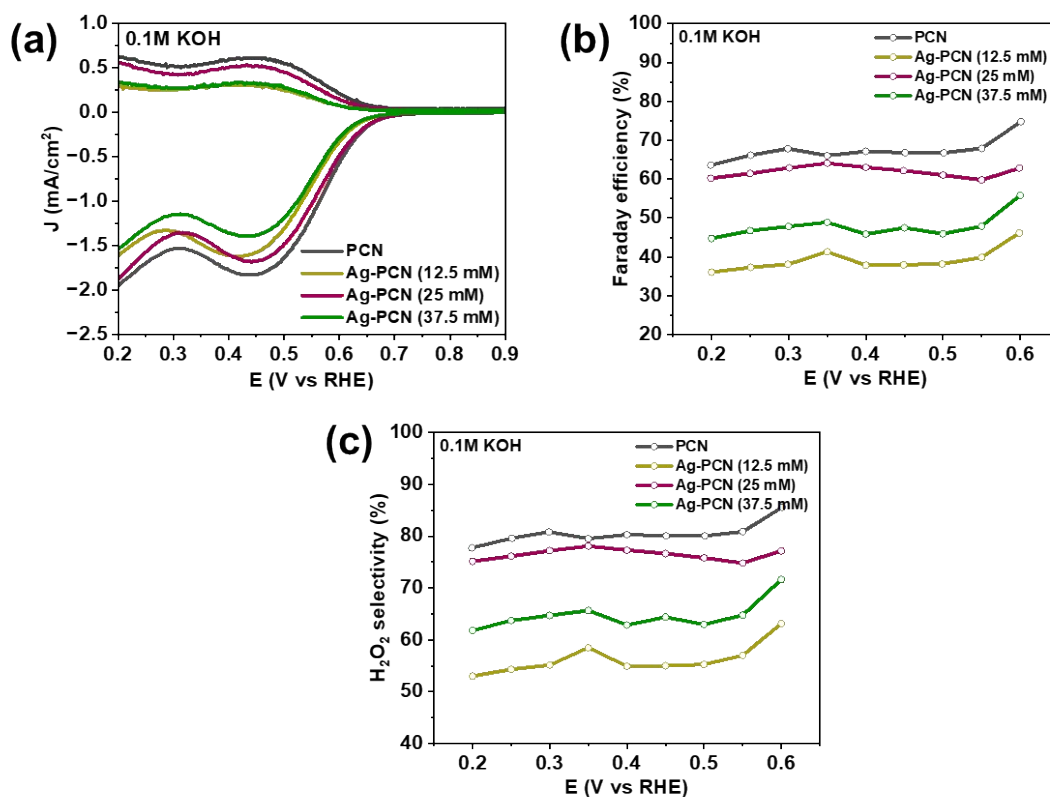

**Figure S6.**  $\text{H}_2\text{O}_2$  electroproduction in 0.1M KOH (a) LSV at 1600 rpm, (b) Number of electron transfer, and (c)  $\text{H}_2\text{O}_2$  selectivity for PCN and Ag-PCN with different compositions.



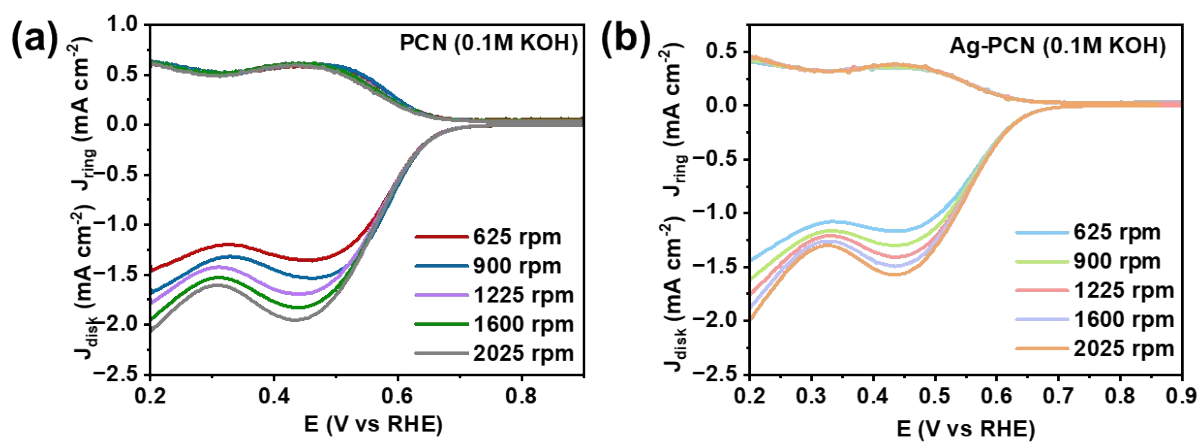

**Figure S7.** LSV at different rotation rates in 0.1M KOH for (a) PCN , and (b) Ag-PCN.

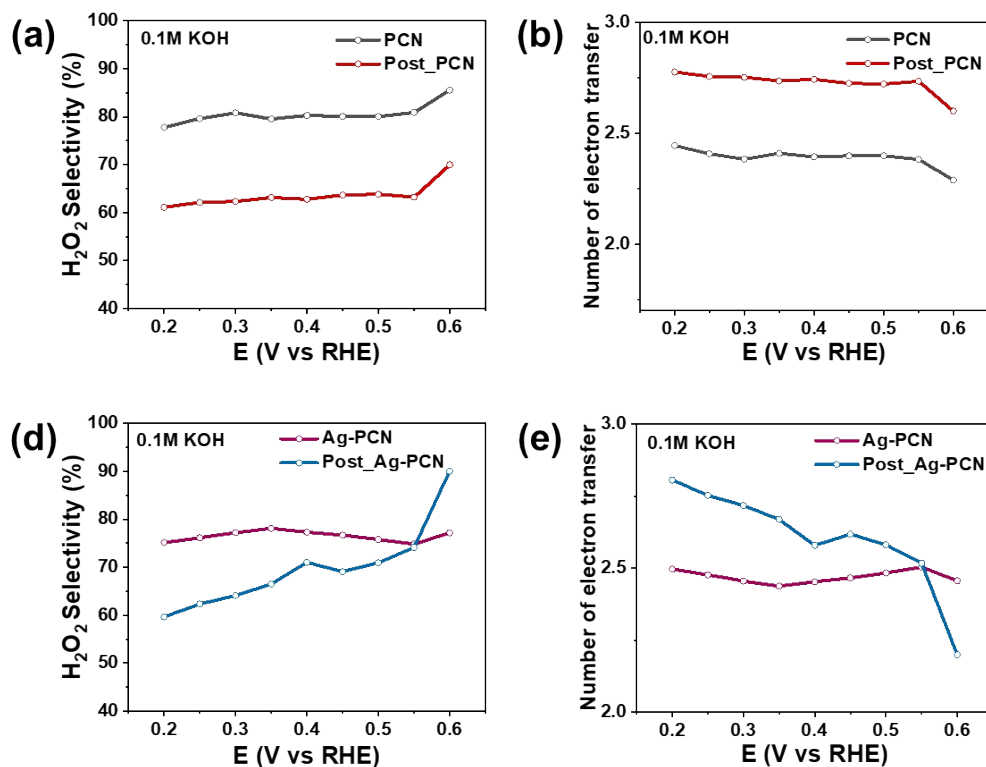

**Figure S8.** (a)  $H_2O_2$  production selectivity of PCN before after 10h stability, (b) Number of electron transfer in PCN before after 10h stability test, (c)  $H_2O_2$  production selectivity of Ag-PCN before after 18h stability test, (d) Number of electron transfer in Ag-PCN before after 18h stability test in 0.1MKOH in 0.2-0.6 potential verses RHE.



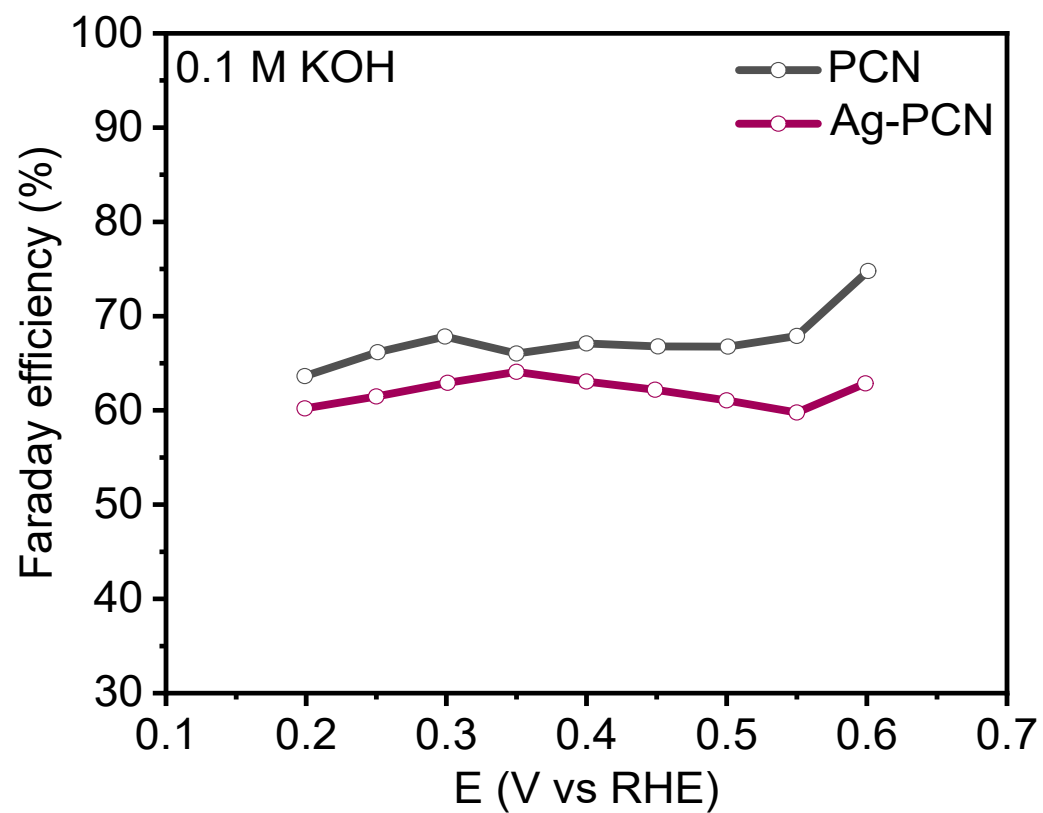

**Figure S9. (a)** Faradic efficiency (FE) of PCN and Ag-PCN in 0.1KOH.

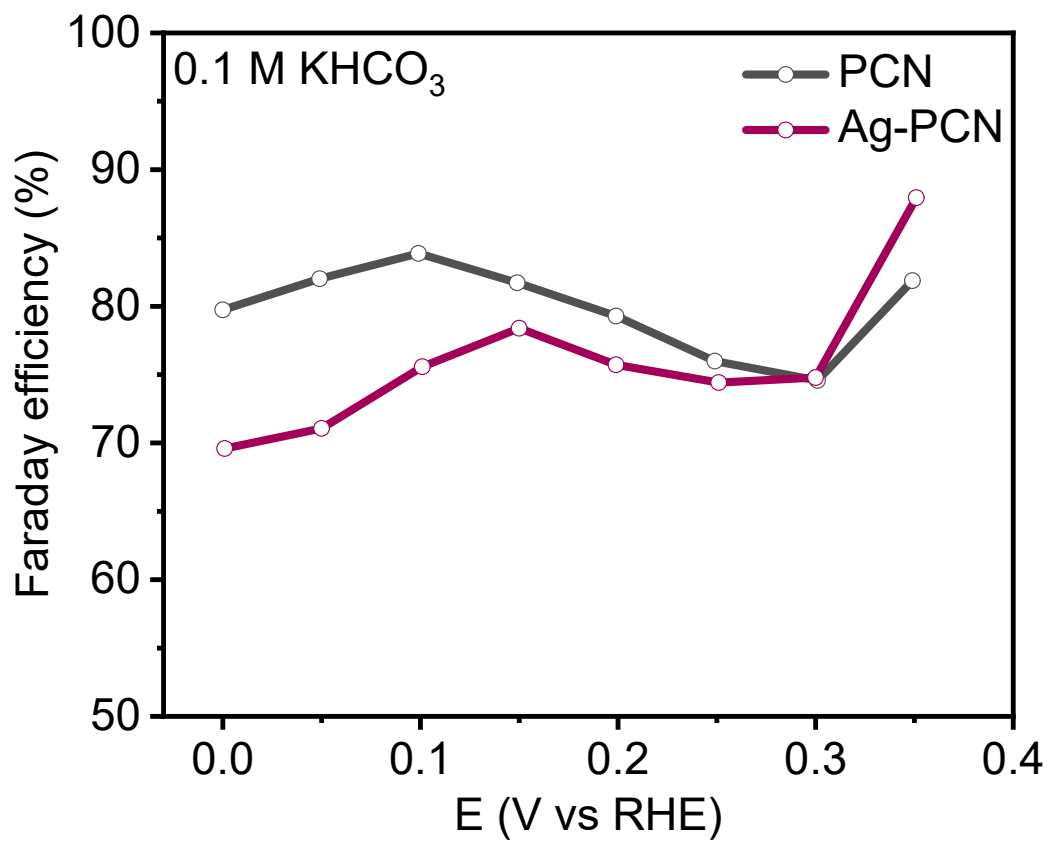

**Figure S10. (a)** Faradic efficiency (FE) of PCN and Ag-PCN in 0.1KHCO<sub>3</sub>.

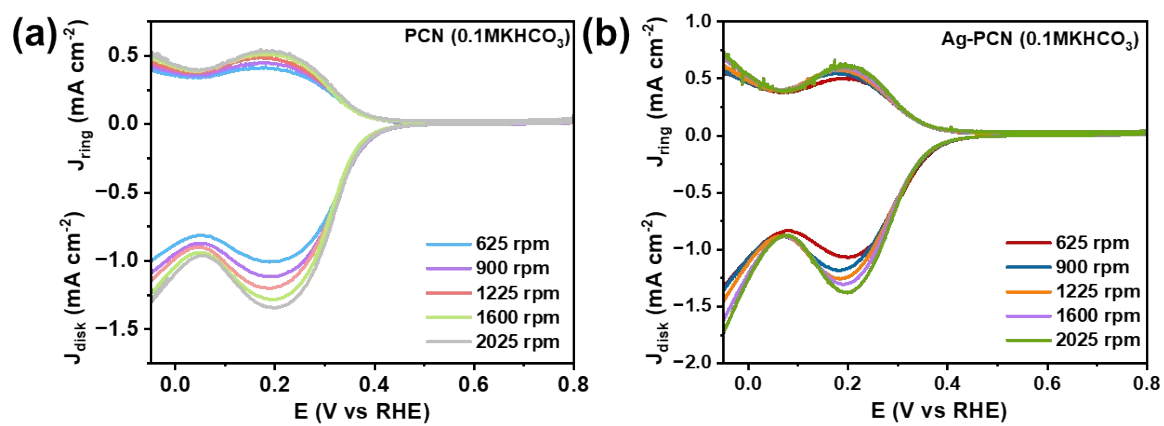

**Figure S11.** LSV at different rotation rates in 0.1M  $\text{KHCO}_3$  for (a) PCN, and (b) Ag-PCN.

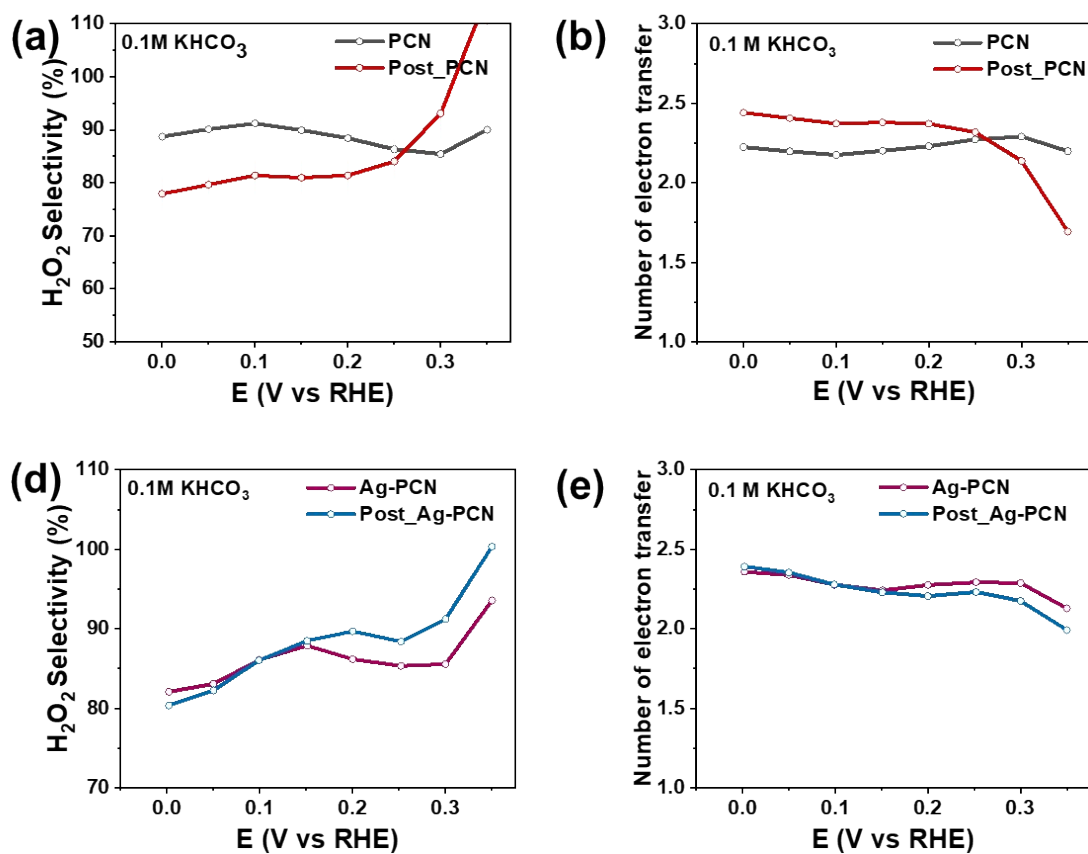

**Figure S12.** (a) H<sub>2</sub>O<sub>2</sub> production selectivity of PCN before after 60h stability, (b) Number of electron transfer in PCN before after 60h stability test, (c) H<sub>2</sub>O<sub>2</sub> production selectivity of Ag-PCN before after 60h stability test, (d) Number of electron transfer in Ag-PCN before after 60h stability test in 0.1MKHCO<sub>3</sub> in 0.-0.35 potential verses RHE.

**Table S1.** PCN and Ag-PCN weight before and after one-week chemical stability tests.

| <b>Catalyst</b> | <b>Initial Weight (mg)</b> | <b>Weight after one week in<br/>3% H<sub>2</sub>O<sub>2</sub></b> |
|-----------------|----------------------------|-------------------------------------------------------------------|
| PCN             | 70                         | 63 (10% loss)                                                     |
| Ag-PCN          | 70                         | 69 (1% loss)                                                      |

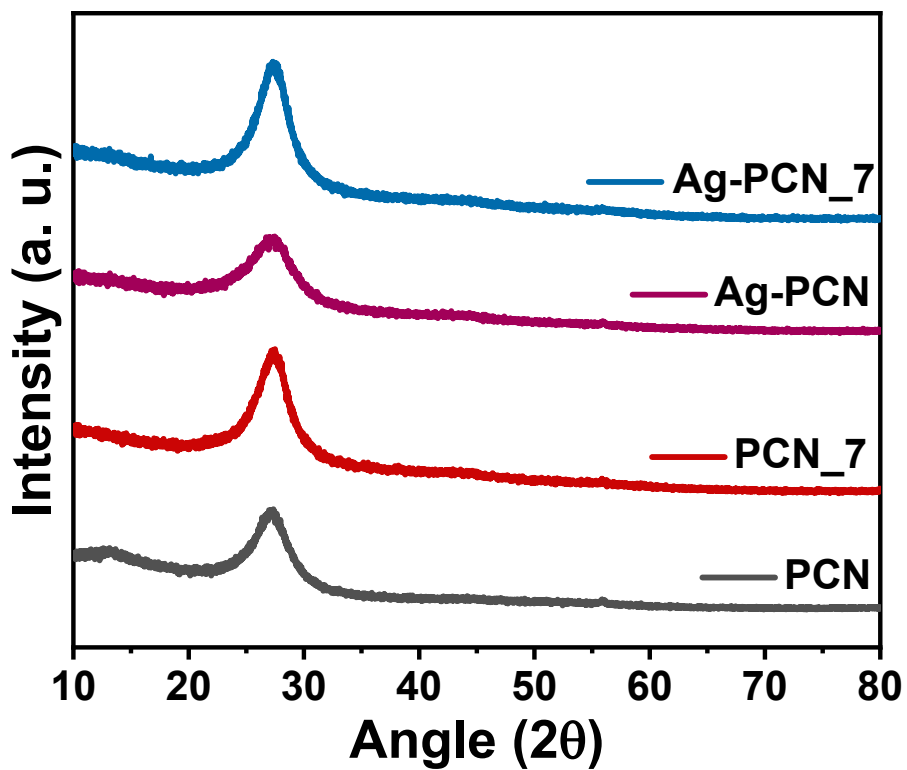

**Figure S13.** XRD spectra of PCN and Ag-PCN before and after one-week chemical stability test in 3%  $\text{H}_2\text{O}_2$

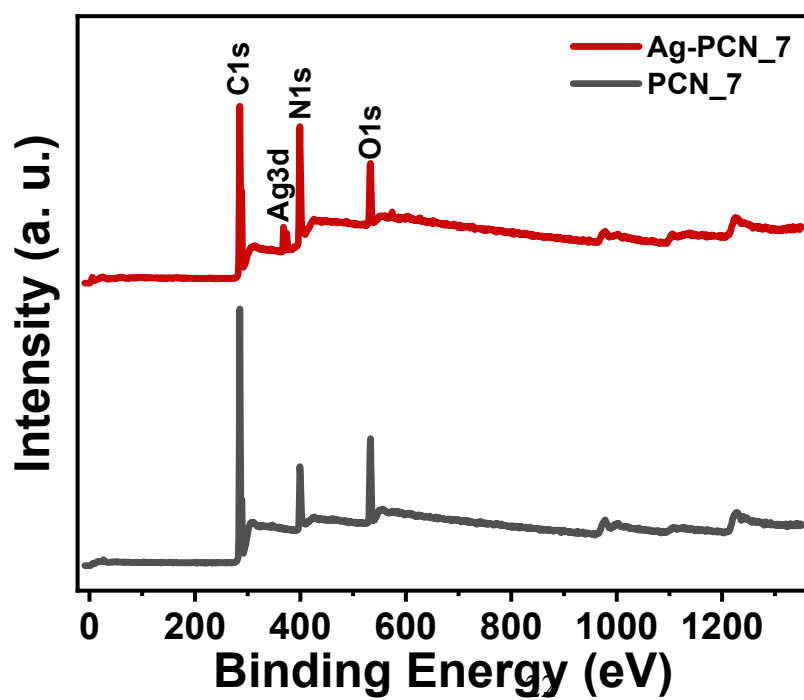

**Figure S14.** XPS survey spectra of PCN and Ag-PCN before and after one-week chemical stability test in 3%  $\text{H}_2\text{O}_2$

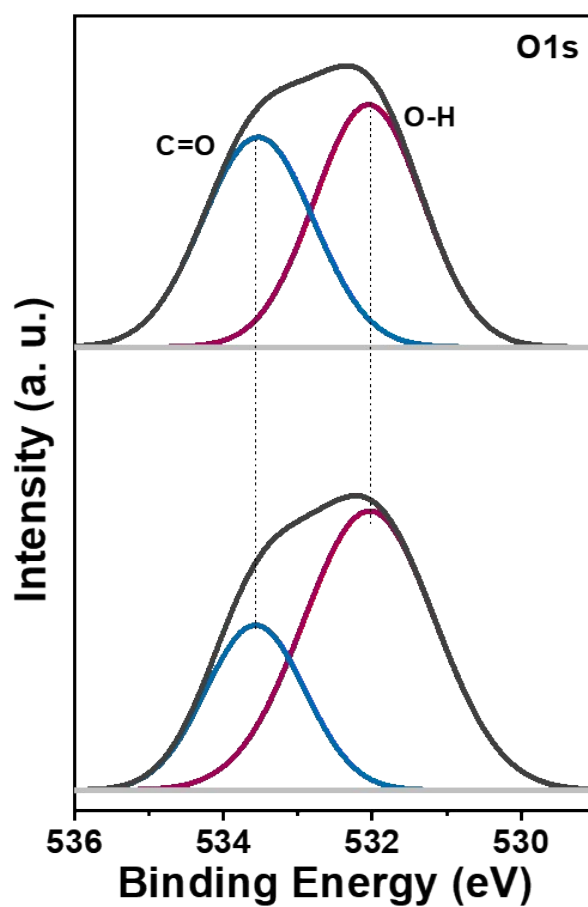

**Figure S15.** High resolution O1s spectra of Ag-PCN before and after one-week chemical stability test in 3%  $\text{H}_2\text{O}_2$ .

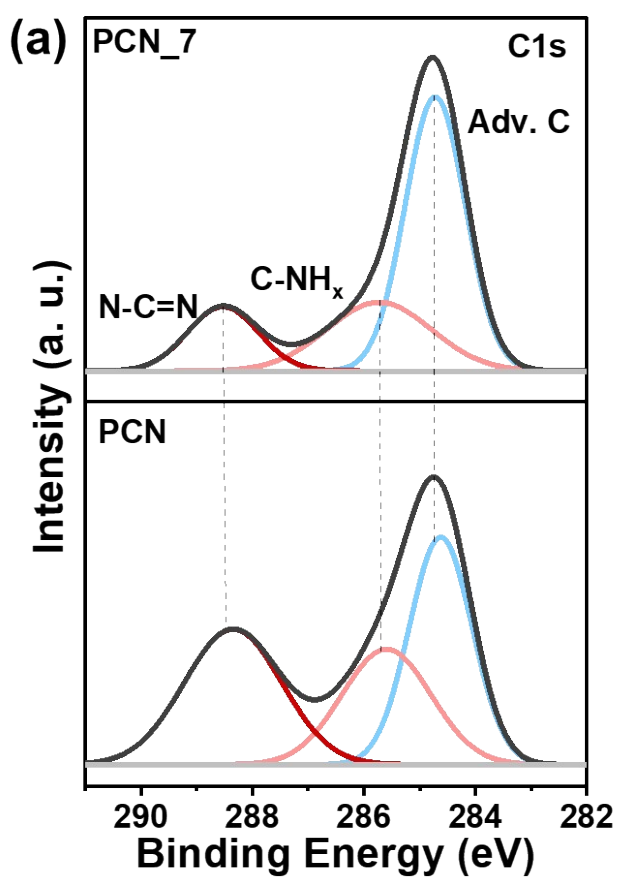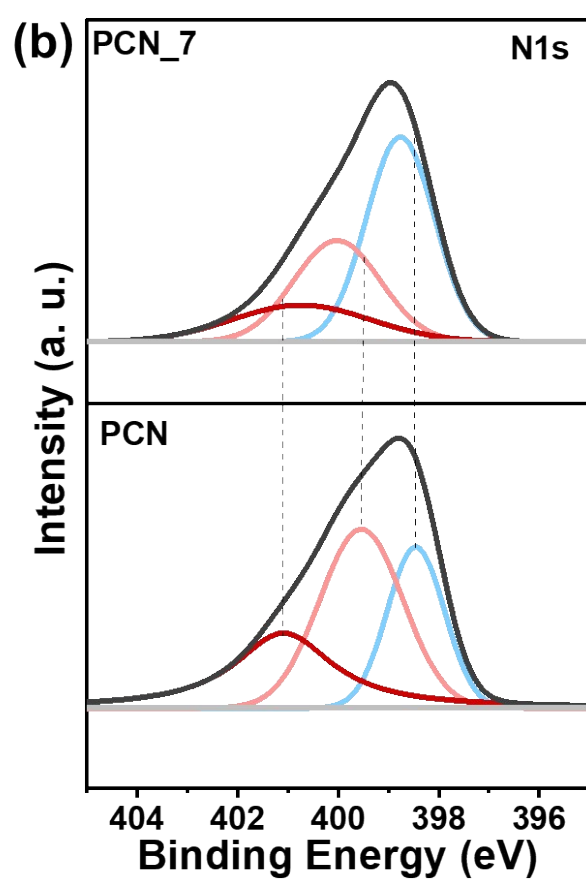



**Figure S16.** High resolution C1s and N1s spectra of PCN before and after one-week chemical stability test in 3% H<sub>2</sub>O<sub>2</sub>.

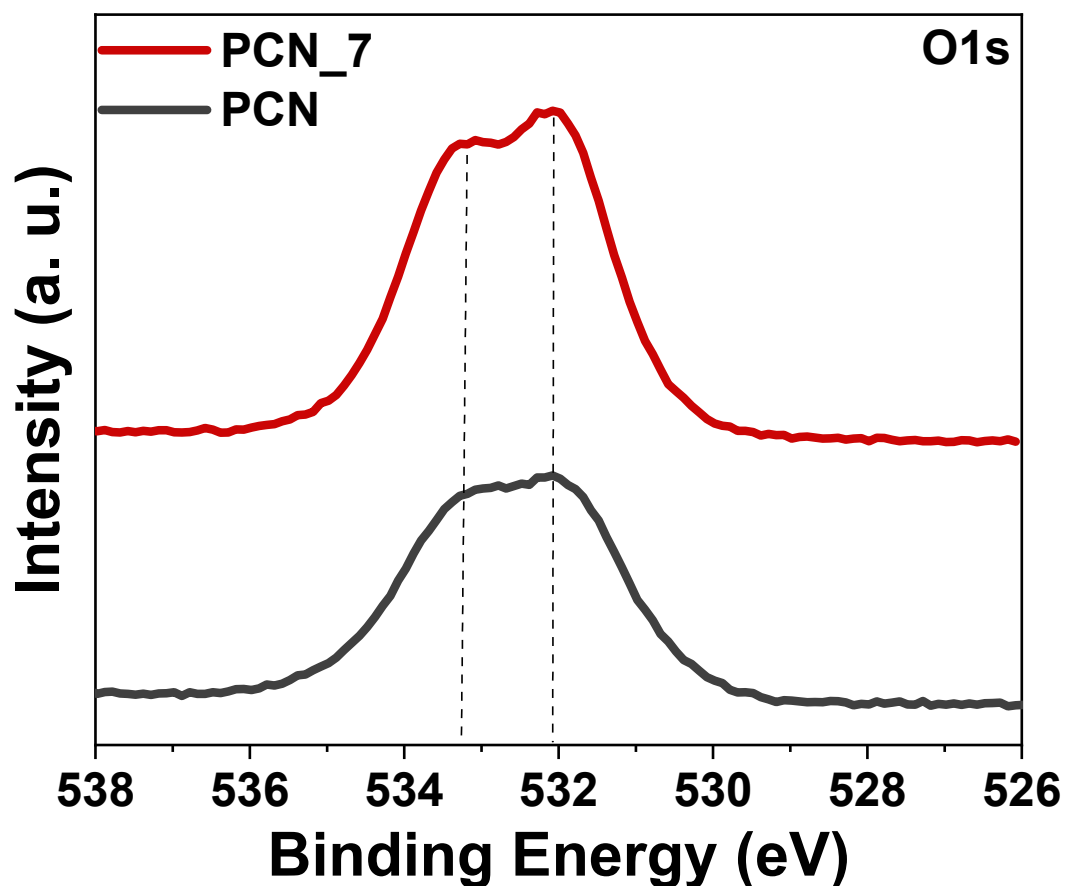

**Figure S17.** High resolution O1s spectra of PCN before and after one-week chemical stability test in 3% H<sub>2</sub>O<sub>2</sub>.

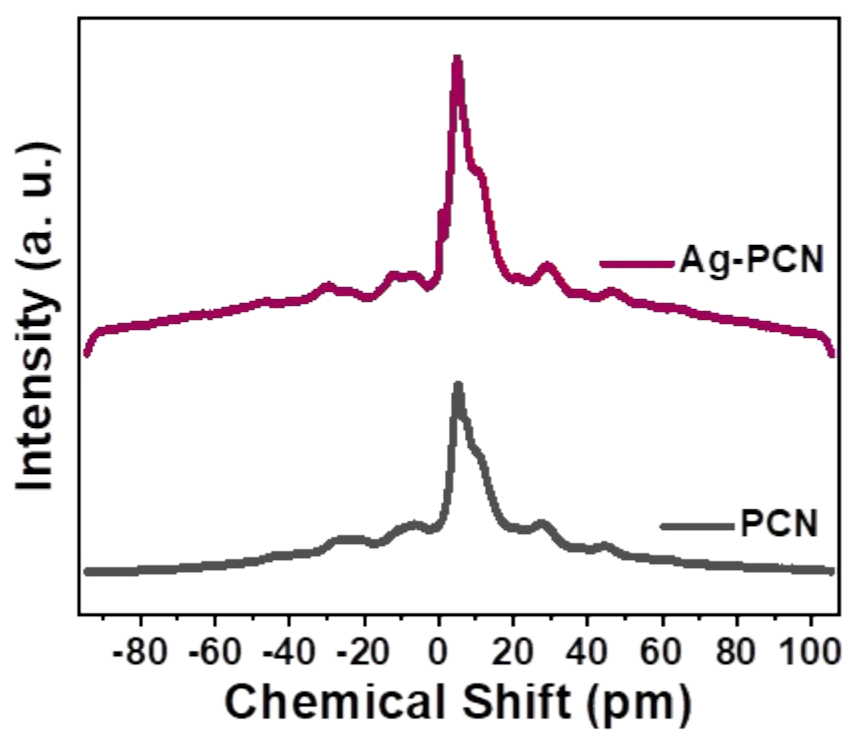

**Figure S18.**  $^1\text{H}$ NMR spectra of PCN and Ag-PCN.

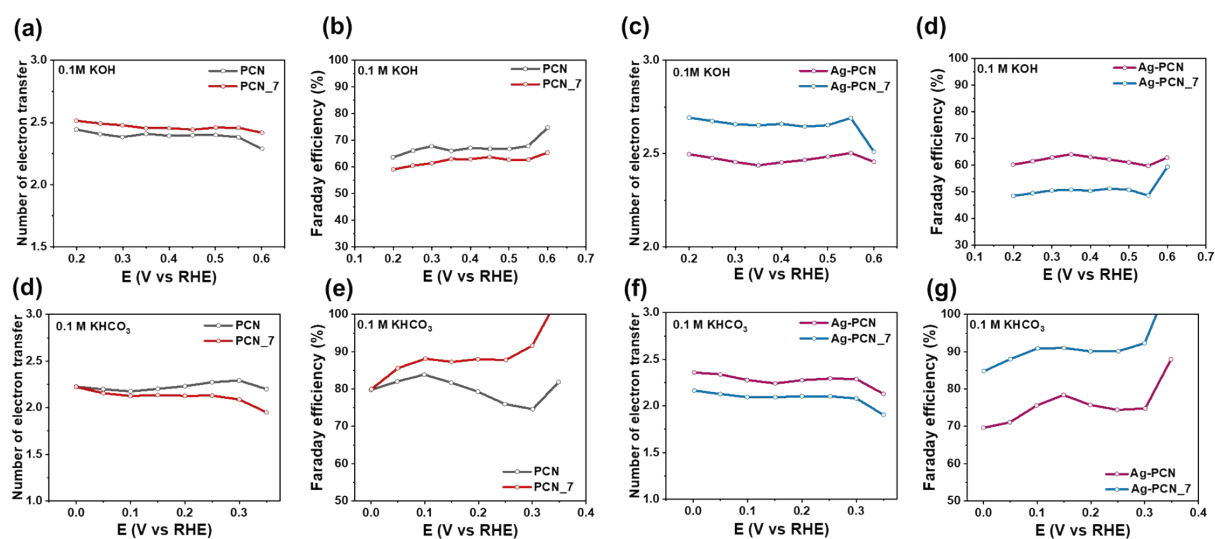

**Figure S19.** Number of electro transfer before and after one week stability test in 3% H<sub>2</sub>O<sub>2</sub> for (a) PCN and PCN<sub>7</sub> in 0.1M KOH, (b) Ag-PCN and Ag-PCN<sub>7</sub> in 0.1M KOH, (c) PCN and PCN<sub>7</sub> in 0.1M KHCO<sub>3</sub>, and (d) Ag-PCN and Ag-PCN<sub>7</sub> in 0.1M KHC

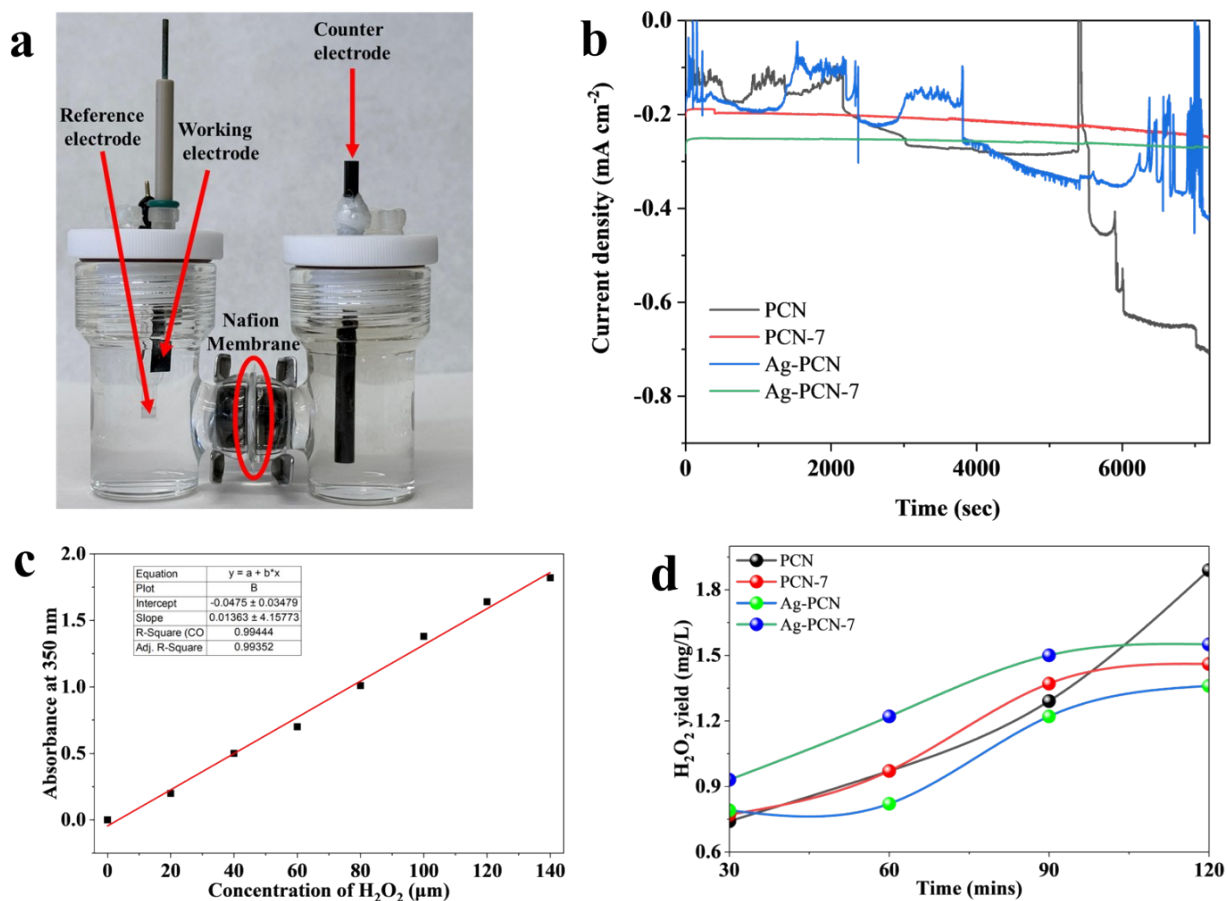

Figure S20. a. Photograph of two compartment H-type electrochemical cell, b. Chronoamperometry test of PCN, PCN-7, Ag-PCN, and Ag-PCN-7, c.  $\text{H}_2\text{O}_2$  calibration curve for the UV-Vis spectrophotometric method and the measured  $\text{H}_2\text{O}_2$  concentration, d. Experimentally measured  $\text{H}_2\text{O}_2$  concentration

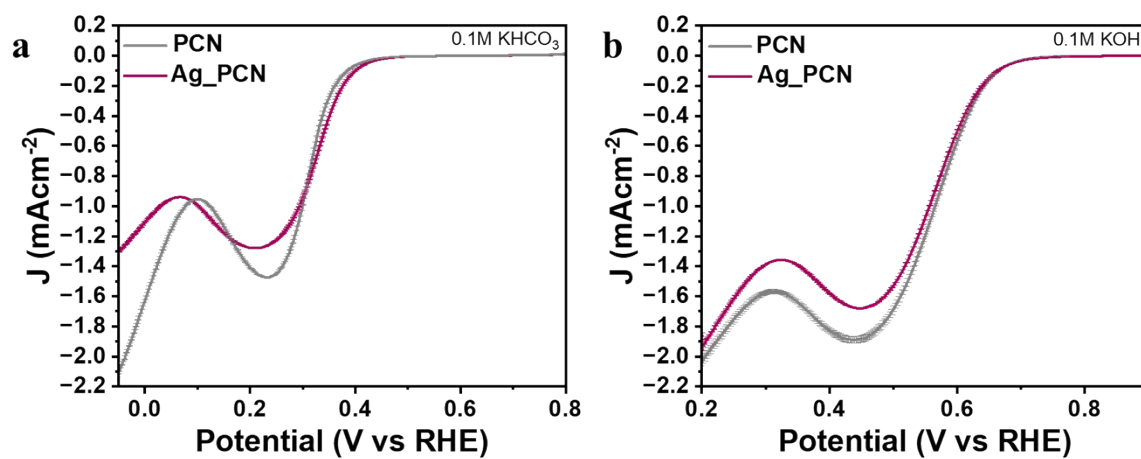

Figure S21. LSV curves with error bars representing the standard deviation from two independent measurements (a) PCN and Ag-PCN in 0.1 M KHCO<sub>3</sub> and (b) 0.1M KOH

## Supporting Information

**Table S2. Comparison of electrochemical H<sub>2</sub>O<sub>2</sub> production metrics for Ag-PCN with state-of-the-art single-atom catalysts**

| Materials                  | Matrix                                     | Selectivity (%) | Faradaic Efficiency (%) | Electrolyte                   | Ref                  |
|----------------------------|--------------------------------------------|-----------------|-------------------------|-------------------------------|----------------------|
| <i>PCN</i>                 | <i>Polymeric carbon<br/>nitride</i>        | <i>82</i>       | <i>75</i>               | <i>0.1M KOH</i>               | <i>This<br/>work</i> |
| <i>PCN</i>                 |                                            | <i>80</i>       | <i>70</i>               | <i>0.1M KHCO<sub>3</sub></i>  |                      |
| <i>Ag-PCN</i>              |                                            | <i>80</i>       | <i>70</i>               | <i>0.1M KOH</i>               |                      |
| <i>Ag-PCN</i>              |                                            | <i>70</i>       | <i>88</i>               | <i>0.1 M KHCO<sub>3</sub></i> |                      |
| CNNS                       | g-C <sub>3</sub> N <sub>4</sub> nanosheets | 61              | -                       | 0.1M PBS                      | 14                   |
| Ni <sub>0.10</sub> SA/CNNS |                                            | 98              | 97                      |                               |                      |
| Mn <sub>0.10</sub> SA/CNNS |                                            | 95              | -                       |                               |                      |
| Zn <sub>0.10</sub> SA/CNNS |                                            | 93              | -                       |                               |                      |
| Cu <sub>0.10</sub> SA/CNNS |                                            | 90              | -                       |                               |                      |
| Fe <sub>0.10</sub> SA/CNNS |                                            | 86              | -                       |                               |                      |
| Co <sub>0.10</sub> SA/CNNS |                                            | 76              | -                       |                               |                      |
| CNNs                       | g-C <sub>3</sub> N <sub>4</sub> nanosheets | 76              | 60                      | 0.1M PBS                      | 15                   |
| K-Co/CNNs                  |                                            | 97              | 91                      |                               |                      |
| CoNC-O                     | N doped C                                  | 88.5            | -                       | 0.1M HClO <sub>4</sub>        |                      |

# Equal contribution

|                                         |                                            |      |     |                                      |    |
|-----------------------------------------|--------------------------------------------|------|-----|--------------------------------------|----|
| CoNC-O                                  |                                            | 79   | -   | 0.1M PBS                             | 16 |
| Pt <sub>0.21</sub> /CN                  | g-C <sub>3</sub> N <sub>4</sub> nanosheets | 98   | 96  | 0.1M KOH                             | 17 |
| Ni-N <sub>4</sub> -O                    | N doped C                                  | 95   | -   | 0.1M KOH                             | 18 |
| g-C <sub>3</sub> N <sub>4</sub> /CQDs-X | g-C <sub>3</sub> N <sub>4</sub>            | 95   | -   | 0.1M KOH                             | 19 |
| Mn-CN/C                                 | Carbon dots                                | 90   | -   | 0.1M KOH                             | 20 |
| NiSA-NC                                 | N doped C                                  | 81   | -   | 0.1M Na <sub>2</sub> SO <sub>4</sub> | 21 |
| Cu/NCNSs                                | N doped C<br>nanosheets                    | 76   | -   | 0.1M PBS                             | 22 |
| Co <sub>1</sub> /NG(O)                  | N doped graphene                           | 82   | -   | 0.1M KOH                             | 23 |
| InSAs/NSBC                              | N,S and B doped<br>carbon nanorods         | 95.4 | -   | 0.1M KOH                             | 24 |
|                                         |                                            | 92   | -   | 0.1M PBS                             |    |
| O-C(Al)                                 | MOF                                        | 95   |     | 0.1M NaOH                            | 25 |
|                                         |                                            | 90   | N.A | 0.1M PBS                             |    |

## Supporting Information

**Table S3. Comparison of chemical and electrochemical stability**

| Catalyst                   | Type of test                                                                   | Material Degradation | Selectivity |           | Electrolyte                  | Ref              |
|----------------------------|--------------------------------------------------------------------------------|----------------------|-------------|-----------|------------------------------|------------------|
|                            |                                                                                |                      | Initial     | Final     |                              |                  |
| <i>PCN</i>                 | <i>CA-10 hours</i>                                                             | -                    | 85          | 70        | <i>0.1M KOH</i>              | <i>This work</i> |
| <i>Ag-PCN</i>              | <i>CA-18 hours</i>                                                             | -                    | 77          | 90        | <i>0.1M KOH</i>              |                  |
| <i>PCN</i>                 | <i>CA-60 hours</i>                                                             | -                    | 90          | 100       | <i>0.1M KHCO<sub>3</sub></i> |                  |
| <i>Ag-PCN</i>              | <i>CA-60 hours</i>                                                             | -                    | 94          | 100       | <i>0.1M KHCO<sub>3</sub></i> |                  |
| <i>PCN</i>                 | <i>Chemical stability (Soaked in 3% H<sub>2</sub>O<sub>2</sub> for 1 week)</i> | 9%                   | 85          | 79        | <i>0.1M KOH</i>              |                  |
| <i>PCN</i>                 |                                                                                |                      | 90          | 100       | <i>0.1M KHCO<sub>3</sub></i> |                  |
| <i>Ag-PCN</i>              |                                                                                | 1%                   | 77          | 75        | <i>0.1M KOH</i>              |                  |
| <i>Ag-PCN</i>              |                                                                                |                      | 93          | 100       | <i>0.1M KHCO<sub>3</sub></i> |                  |
| Ni <sub>0.10</sub> SA/CNNS | CP-16hrs                                                                       | -                    | 98          | 96.6-98.8 | 0.1M PBS                     | 26               |
| Ni <sub>0.10</sub> SA/CNNS | Physical stability- The catalyst ink was stored for 68 days and used again     | NA                   | 98          | 94        |                              |                  |

# Equal contribution



|                        |              |    |    |    |          |    |
|------------------------|--------------|----|----|----|----------|----|
| Pt <sub>0.21</sub> /CN | 40000 cycles | NA | 98 | 94 | 0.1M KOH | 27 |
|------------------------|--------------|----|----|----|----------|----|

## Supporting Information

**Table S4. The yield rate of H<sub>2</sub>O<sub>2</sub> produced by H-cell experiments**

| Catalyst            | Type of cell            | Electrolyte                          | H <sub>2</sub> O <sub>2</sub><br>productivity<br>(mol gcat <sup>-1</sup> h <sup>-1</sup> ) | Faradaic<br>Efficiency | Reference |
|---------------------|-------------------------|--------------------------------------|--------------------------------------------------------------------------------------------|------------------------|-----------|
| PCN                 | H-Cell                  | 0.1M KHCO <sub>3</sub>               | 0.00981                                                                                    | 73.54                  | Our Work  |
| PCN-7               |                         |                                      | 0.0101475                                                                                  | 54.66                  |           |
| Ag-PCN              |                         |                                      | 0.0104805                                                                                  | ~100                   |           |
| Ag-PCN-7            |                         |                                      | 0.01233                                                                                    | 53.08                  |           |
| Ni-N <sub>4</sub> O | H-Cell                  | 0.1M PBS                             | 0.3168                                                                                     | -                      | 28        |
| InSAs/NSBC          | PEMFC                   | 0.1M KOH                             | 6.49                                                                                       | 77.3                   | 29        |
|                     |                         | 0.1M PBS                             | 6.71                                                                                       | 80                     |           |
| COF-366-Co          | H-shape<br>electrolyzer | 0.1M KOH                             | 0.909                                                                                      | 82                     | 30        |
| O-C(Al)             | H-Cell                  | 0.5M Na <sub>2</sub> SO <sub>4</sub> | 0.026                                                                                      | 92                     | 31        |

# Equal contribution

**Table S5:** Free energy calculations values:

| OOH Adsorption Sites                               | Adsorption Energy $E_{\text{ads}}$ (eV) | $\Delta\text{ZPE}$ | $T\Delta S$ | Adsorption Free Energy (eV) |          |
|----------------------------------------------------|-----------------------------------------|--------------------|-------------|-----------------------------|----------|
|                                                    |                                         |                    |             | U= 0.0 V                    | U= 0.7 V |
| OOH on C atom of pristine $\text{C}_3\text{N}_4$   | -2.24                                   | 0.469              | 0.146       | -1.91                       | -1.21    |
| OOH on C atom of $\text{Ag}@\text{C}_3\text{N}_4$  | -2.03                                   | 0.472              | 0.143       | -1.70                       | -1.0     |
| OOH on Ag atom of $\text{Ag}@\text{C}_3\text{N}_4$ | -1.69                                   | 0.430              | 0.194       | 1.45                        | -0.75    |

**Table S6:** Band gap values before and after \*OOH intermediate adsorption:

| System                       | Band Gap (eV) |
|------------------------------|---------------|
| Pristine Layer               | 1.18          |
| <a href="#">Ag-PCN</a> Layer | 1.17          |
| topC@Ag-PCN                  | 1.17          |
| topAg@Ag-PCN                 | 0.32          |

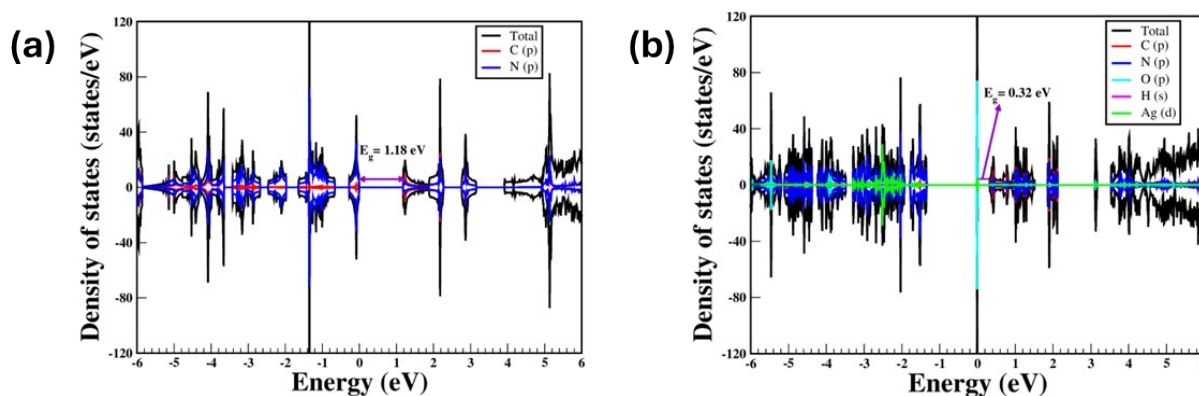

**Figure S22.** Spin-polarized projected density of states (PDOS) plot of (a) pristine  $\text{C}_3\text{N}_4$  monolayer, (b) after  $\ast\text{OOH}$  adsorption on top of Ag inside  $\text{C}_3\text{N}_4$  layer. Fermi energy is shifted at zero eV.

## References

1. Hohenberg, P.; Kohn, W. Phys. Rev.1964,136, B864–B871.
2. Kohn, W.; Sham, L. J. Phys. Rev.1965,140, A1133–A1138.
3. Perdew, J. P.; Burke, K.; Ernzerhof, M. Phys. Rev. Lett.1996,77, 3865–3868.
4. Blöchl, P. E. Projector augmented-wave method. Phys. Rev. B1994,50, 17953–17979.24.
5. Kresse, G.; Furthmüller, J. Phys. Rev. B1996, 54, 11169–11186.
6. Kresse, G.; Furthmüller, Comput. Mater. Sci. 1996, 6 15-50.
7. Monkhorst, H. J.; Pack, J. D. Phys. Rev.B1976,13, 5188-5192.
8. S. Grimme, J. Antony, S. Ehrlich, H. Krieg, J. Chem. Phys. 2010, 132, 154104.
9. Momma, K; Izumi, F. J. Appl. Crstallogr. 2011, 44, 1272-1276

10. J. K. Nørskov, T. Bligaard, A. Logadottir, J. R. Kitchin, J. G. Chen, S. Pandelov and U. Stimming, *J Electrochem Soc*, 2005, 152, J23.
11. J. K. Nørskov, J. Rossmeisl, A. Logadottir, L. Lindqvist, J. R. Kitchin, T. Bligaard and H. Jónsson, *Journal of Physical Chemistry B*, 2004, 108, 17886–17892.
12. H. A. Hansen, J. Rossmeisl and J. K. Nørskov, *Physical Chemistry Chemical Physics*, 2008, 10, 3722.
13. F. Xiang, X. Zhao, J. Yang, N. Li, W. Gong, Y. Liu, A. Burguete-Lopez, Y. Li, X. Niu and A. Fratalocchi, *Advanced Materials*, DOI:10.1002/adma.202208533.
14. Yang H, Ma F, Lu N, Tian S, Liu G, Wang Y, Wang Z, Wang D, Tao K, Zhang H, Peng S. *Nanoscale Horizons*. 2023;8(5):695-704.
15. Wang Y, Yang H, Lu N, Wang D, Zhu K, Wang Z, Mou L, Zhang Y, Zhao Y, Tao K, Ma F. *Nanoscale*. 2023;15(47):19148-58.
16. Lu T, Liu Y, Li Y, Chen J, Chen S, Liao X, Xia W, Zhou T, Wang W, Chen Z, Huang R. *Applied Catalysis B: Environment and Energy*. 2025 15; 365:124949.
17. Yang H, Lu N, Zhang J, Wang R, Tian S, Wang M, Wang Z, Tao K, Ma F, Peng S. *Carbon Energy*. 2023 Sep;5(9):e337.
18. Liu Z, Zhang B, Liu Y, Wang C, Ye C, Yang W. *A Journal of Materials Chemistry A*. 2025;13(15):10683-93.
19. H. Yang, F. Ma, N. Lu, S. Tian, G. Liu, Y. Wang, Z. Wang, D. Wang, K. Tao, H. Zhang and S. Peng, *Nanoscale Horizons*, 2023, **8**, 695–704.
20. Y. Wang, H. Yang, N. Lu, D. Wang, K. Zhu, Z. Wang, L. Mou, Y. Zhang, Y. Zhao, K. Tao, F. Ma and S. Peng, *Nanoscale*, 2023, **15**, 19148–19158.
21. T. Lu, Y. Liu, Y. Li, J. Chen, S. Chen, X. Liao, W. Xia, T. Zhou, W. Wang, Z. Chen, R. Huang and H. Wang, *Appl. Catal. B Environ.*, 2025, **365**, 124949.
22. H. Yang, N. Lu, J. Zhang, R. Wang, S. Tian, M. Wang, Z. Wang, K. Tao, F. Ma and S. Peng, *Carbon Energy*, 2023, **5**, 1–12.

23. Z. Liu, B. Zhang, Y. Liu, C. Wang, C. Ye and W. Yang, *J. Mater. Chem. A*, 2025, **13**, 10683–10693.
24. Y. Wang, Z. Yang, C. Zhang, Y. Feng, H. Shao, J. Chen, J. Hu and L. Zhang, *Ultrason. Sonochem.*, 2023, **99**, 106582.
25. Y. Zeng, X. Tan, Z. Zhuang, C. Chen and Q. Peng, *Angew. Chemie - Int. Ed.*, DOI:10.1002/anie.202416715.
26. Z. Lin, J. Lohwacharin, Y. Li and Y. Wang, *J. Colloid Interface Sci.*, DOI:10.1016/j.jcis.2025.138814.
27. C. Ye, Y. Zhou, H. Li and Y. Shen, *Green Chem.*, 2023, **25**, 3931–3939.
28. E. Jung, H. Shin, B. H. Lee, V. Efremov, S. Lee, H. S. Lee, J. Kim, W. Hooch Antink, S. Park, K. S. Lee, S. P. Cho, J. S. Yoo, Y. E. Sung and T. Hyeon, *Nat. Mater.*, 2020, **19**, 436–442.
29. E. Zhang, L. Tao, J. An, J. Zhang, L. Meng, X. Zheng, Y. Wang, N. Li, S. Du, J. Zhang, D. Wang and Y. Li, *Angew. Chemie - Int. Ed.*, DOI:10.1002/anie.202117347.
30. Q. Yang, W. Xu, S. Gong, G. Zheng, Z. Tian, Y. Wen, L. Peng, L. Zhang, Z. Lu and L. Chen, *Nat. Commun.*, 2020, **11**, 1–10.
31. C. Liu, H. Li, F. Liu, J. Chen, Z. Yu, Z. Yuan, C. Wang, H. Zheng, G. Henkelman, L. Wei and Y. Chen, *J. Am. Chem. Soc.*, 2020, **142**, 21861–21871.
